# Supplementary material for: In situ synthesis of a 3D highly porous NiO film electrode with enhanced performance for supercapacitors
Source: Royal Society of Chemistry journal article supplement (doi:10.1039/c9qi00944b), 2019-01-01
Supplement: c9qi00944b1.pdf [file c9qi00944b1.pdf]

Electronic Supplementary Material (ESI) for Inorganic Chemistry Frontiers.  
This journal is © the Partner Organisations 2019

## In-situ synthesis of 3D high-Porous NiO film electrode with enhanced performances for supercapacitor

### Supporting information

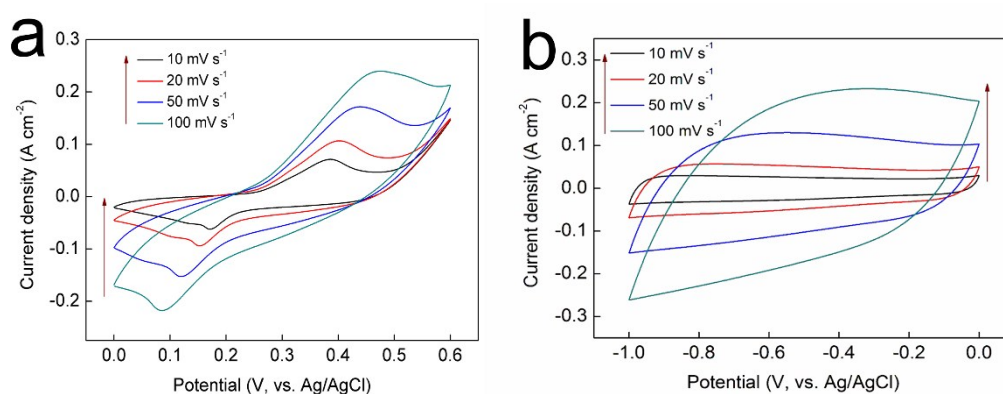

**Fig S1.** The CV curves of (a) NiO electrode (cathode) and (b) as-fabricated activated carbon (AC, anode) electrode at scan rates of 10, 20, 50 and 100 mV s<sup>-1</sup> in 6 M KOH.

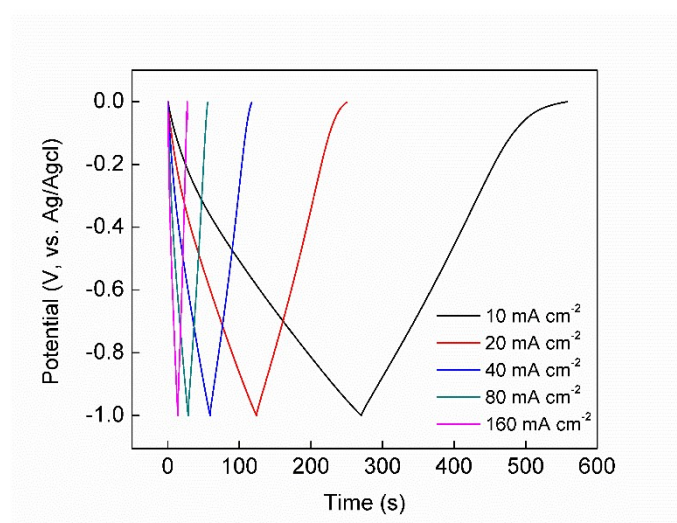

**Fig S2.** The CD curves of as-fabricated activated carbon (AC) electrode at current density of 10, 20, 40, 80 and 160 mA cm<sup>-2</sup> in 6 M KOH.

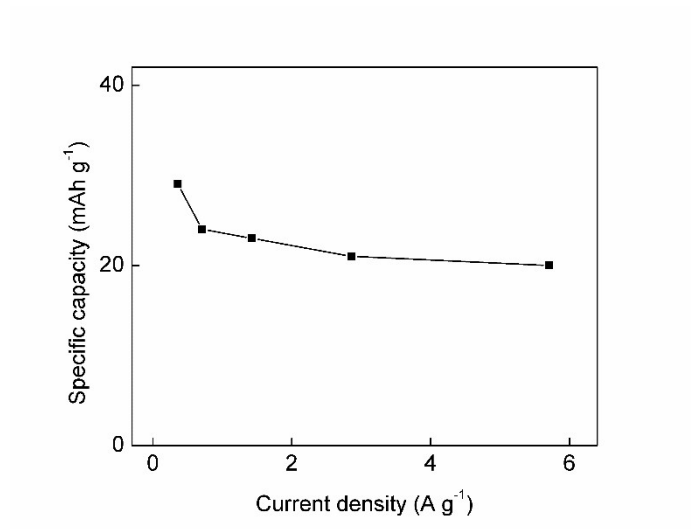

**Fig S3.** The specific capacity-current density curve of as-fabricated activated carbon (AC) electrode at current density of 0.36, 0.71, 1.43, 2.86 and 5.71 A g<sup>-1</sup>.
